# Supplementary material for: Radiation Treatment Patterns for Breast Cancer Brain Metastases
Source: Research Square preprint supplement (doi:10.21203/rs.3.rs-8545320/v1), 2026-02-09
Supplement: Supplementary file 1 [file 70b17177f68d3db76a8f0a2c.docx]

**Supplemental Data:**

Supplemental Figure 1. Distribution of SRS and WBRT cases for treatment of BCBM between 2010 and 2020.

Supplemental Figure 2: Kaplan-Meier Curve Modeling Overall Survival between Patients Receiving Brain RT or no Brain RT

Supplemental Figure 3: Significant difference in OS among patients with BC BM between 2010 and 2020.

Supplemental Table 1. Estimated association between receipt of brain radiation and overall survival.

| **Variable** | **0-48 months** | | **>48 months** | |
| --- | --- | --- | --- | --- |
|  | **Crude HR (95% CI)** | **P-value** | **Crude HR (95% CI)** | **P-value** |
| **Brain Radiation**  Yes  No | 0.89 (0.85-0.93)  Ref | <0.0001 | 1.09 (0.90-1.32)  Ref | 0.3850 |

| **Supplemental Table 2—Unweighted comparing brain radiation to no brain radiation (n=8,909)** | | | | | | |
| --- | --- | --- | --- | --- | --- | --- |
|  | **Unweighted** | | | **Weightedb** | | |
|  | **Brain Radiation (n=3,864)** | **No Brain Radiation (n=5,045)** | **Standardize Differencea** | **Brain Radiation (n=3,864)c** | **No Brain Radiation (n=5,045)c** | **Standardize Differenced** |
| **Age** |  |  | 0.1505 |  |  | 0e |
| Median (IQR) | 60 (52, 68) | 62 (53, 70) |  | 62 (54, 69) | 61 (54, 69) |  |
|  |  |  |  |  |  |  |
| **Race**, n (%) |  |  |  |  |  |  |
| White | 2946 (76.9%) | 3821 (76.4%) | 0.0110 | 77.7% | 77.7% | 0e |
| African American/Black | 714 (18.6%) | 924 (18.5%) | 0.0040 | 17.9% | 17.9% | 0e |
| Asian | 111 (2.9%) | 163 (3.3%) | 0.0210 | 3.1% | 3.1% | 0e |
| Other | 60 (1.6%) | 91 (1.8%) | 0.0197 | 1.3% | 1.3% | 0e |
|  |  |  |  |  |  |  |
| **Ethnicity,** n (%) |  |  |  |  |  |  |
| Non-Hispanic | 3508 (92.9%) | 4503 (91.9%) | 0.0393 | 92.9% | 92.9% | 0e |
| Hispanic | 268 (7.1%) | 399 (8.1%) | 0.0393 | 7.1% | 7.1% | 0e |
|  |  |  |  |  |  |  |
| **Charlson-Deyo Score**, n (%) |  |  |  |  |  |  |
| 0 | 3118 (80.7%) | 4015 (79.6%) | 0.0278 | 79.2% | 79.2% | 0e |
| 1 | 505 (13.1%) | 679 (13.5%) | 0.0115 | 13.9% | 13.9% | 0e |
| 2 | 152 (3.9%) | 209 (4.1%) | 0.0106 | 4.3% | 4.3% | 0e |
| 3+ | 89 (2.3%) | 142 (2.8%) | 0.0324 | 2.6% | 2.6% | 0e |
|  |  |  |  |  |  |  |
| **Insurance**, n (%) |  |  |  |  |  |  |
| Not Insured | 261 (6.9%) | 381 (7.7%) | 0.0338 | 6.9% | 6.9% | 0e |
| Private Insurance | 1553 (40.8%) | 1741 (35.3%) | 0.1124 | 37.6% | 37.6% | 0e |
| Medicaid | 634 (16.6%) | 784 (15.9%) | 0.0200 | 15.5% | 15.5% | 0e |
| Medicare | 1334 (35.0%) | 1974 (40.1%) | 0.1041 | 39.2% | 39.2% | 0e |
| Other Government | 26 (0.7%) | 47 (1.0%) | 0.0301 | 0.8% | 0.8% | 0e |
|  |  |  |  |  |  |  |
| **Median Income Quartiles**, n (%) |  |  |  |  |  |  |
| <$46,227 | 666 (17.2%) | 847 (16.8%) | 0.0119 | 16.4% | 16.1% | 0.0078 |
| $46,227-$57,856 | 769 (19.9%) | 1037 (20.6%) | 0.0163 | 19.9% | 20.9% | 0.0257 |
| $57,587-$74,062 | 814 (21.1%) | 983 (19.5%) | 0.0393 | 21.3% | 19.0% | 0.0571 |
| $74,063 or higher | 1063 (27.5%) | 1519 (30.1%) | 0.0574 | 28.2% | 30.6% | 0.0532 |
| Unknown | 552 (14.3%) | 659 (13.1%) | 0.0356 | 14.2% | 13.4% | 0.0258 |
|  |  |  |  |  |  |  |
| **Education**, n (%) |  |  |  |  |  |  |
| 15.3% or higher | 799 (20.7%) | 1120 (22.2%) | 0.0371 | 20.6% | 21.6% | 0.0252 |
| 9.1%-15.2% | 1018 (26.3%) | 1275 (25.3%) | 0.0245 | 26.0% | 25.0% | 0.0223 |
| 5.0%-9.0% | 911 (23.6%) | 1218 (24.1%) | 0.0133 | 23.6% | 24.4% | 0.0187 |
| <5.0% | 598 (15.5%) | 782 (15.5%) | 0.0007 | 15.9% | 15.8% | 0.0026 |
| Unknown | 538 (13.9%) | 650 (12.9%) | 0.0305 | 14.0% | 13.2% | 0.0223 |
|  |  |  |  |  |  |  |
| **Community**, n (%) |  |  |  |  |  |  |
| Rural | 62 (1.7%) | 72 (1.5%) | 0.0158 | 1.6% | 1.6% | 0e |
| Urban | 500 (13.4%) | 583 (11.8%) | 0.0463 | 12.6% | 12.6% | 0e |
| Metro | 3176 (85.0%) | 4269 (86.7%) | 0.0497 | 85.8% | 85.8% | 0e |
|  |  |  |  |  |  |  |
| **Nodal**, n (%) |  |  |  |  |  |  |
| 0 | 811 (21.0%) | 1108 (22.0%) | 0.0237 | 21.7% | 21.6% | 0.0013 |
| 1 | 1448 (37.5%) | 1850 (36.7%) | 0.0166 | 36.5% | 37.7% | 0.0267 |
| 2 | 407 (10.5%) | 456 (9.0%) | 0.0503 | 10.4% | 9.3% | 0.0371 |
| 3 | 578 (15.0%) | 582 (11.5%) | 0.1011 | 14.2% | 12.3% | 0.0577 |
| Unknown | 620 (16.0%) | 1049 (20.8%) | 0.1227 | 17.2% | 19.0% | 0.0474 |
|  |  |  |  |  |  |  |
| **Grade**, n (%) |  |  |  |  |  |  |
| 1 | 151 (3.9%) | 223 (4.4%) | 0.0256 | 4.1% | 4.4% | 0.0154 |
| 2 | 781 (20.2%) | 1145 (22.7%) | 0.0605 | 21.0% | 23.2% | 0.0535 |
| 3 | 1381 (35.7%) | 1377 (27.3%) | 0.1825 | 34.0% | 29.0% | 0.1072 |
| Unknown | 1551 (40.1%) | 2300 (45.6%) | 0.1103 | 41.0% | 43.4% | 0.0495 |
|  |  |  |  |  |  |  |
| **Subtype**, n (%) |  |  |  |  |  |  |
| ER+/PR+/HER2- | 1012 (26.2%) | 1635 (32.4%) | 0.1369 | 29.9% | 29.9% | 0e |
| ER+/PR (+ or -)/HER2+ | 571 (14.8%) | 619 (12.3%) | 0.0734 | 13.9% | 13.9% | 0e |
| ER-/PR-/HER2+ | 492 (12.7%) | 446 (8.8%) | 0.1257 | 10.5% | 10.5% | 0e |
| ER-/PR-/HER2- | 893 (23.1%) | 812 (16.1%) | 0.1774 | 19.6% | 19.6% | 0e |
| Unknown | 896 (23.2%) | 1533 (30.4%) | 0.1631 | 26.1% | 26.1% | 0e |
|  |  |  |  |  |  |  |
| **Treatment facility type**, n (%) |  |  |  |  |  |  |
| Community Cancer Program | 239 (6.6%) | 355 (7.5%) | 0.0350 | 6.9% | 6.9% | 0e |
| Comprehensive Community Cancer Program | 1377 (38.1%) | 1787 (37.8%) | 0.0060 | 37.8% | 37.8% | 0e |
| Academic/Research Program | 1259 (34.8%) | 1614 (34.1%) | 0.0145 | 34.4% | 34.4% | 0e |
| Integrated Network Cancer Program | 741 (20.5%) | 973 (20.6%) | 0.0021 | 20.9% | 20.9% | 0e |
|  |  |  |  |  |  |  |
| **Systemic Therapy**, n (%) |  |  |  |  |  |  |
| Yes | 3188 (82.6%) | 3328 (66.1%) | 0.3846 | 76.5% | 76.5% | 0e |
| No | 672 (17.4%) | 1707 (33.9%) | 0.3846 | 23.5% | 23.5% | 0e |

a Absolute difference in means or proportions divided by pooled standard deviation. Imbalance between brain radiation and no brain radiation groups was defined as an absolute value greater than 0.10; smaller values indicated better balance.

b Using overlap weighting to build analytical cohort in which group or treatment type (brain radiation or no brain radiation) is independent of baseline characteristics influencing the initiation of certain treatment

c Overlap-weighted proportions.

d Overlap-weighted standardized differences. Age, race, ethnicity, charlson-deyo score, insurance, community, subtype, facility type and systemic therapy (use of chemotherapy, hormone therapy and/or immunotherapy) were used to estimate the weights.

e Overlapping weights resulted in exact balance for this variable.

| **Supplemental Table 3—Unweighted comparing WBRT to SRS (n=3,864)** | | | | | | |
| --- | --- | --- | --- | --- | --- | --- |
|  | **Unweighted** | | | **Weightedb** | | |
|  | **WBRT**  **(n=2,863)** | **SRS**  **(n=1,001)** | **Standardize Differencea** | **WBRTc (n=2,863)** | **SRSc**  **(n=1,001)** | **Standardize Differenced** |
| **Age** |  |  | 0.0606 |  |  | 0e |
| Median (IQR) | 60 (52, 68) | 59 (51, 67) |  | 61 (53, 69) | 61 (53, 68) |  |
|  |  |  |  |  |  |  |
| **Race**, n (%) |  |  |  |  |  |  |
| White | 2166 (76.3%) | 780 (78.5%) | 0.0533 | 79.0% | 79.0% | 0e |
| African American/Black | 551 (19.4%) | 163 (16.4%) | 0.0783 | 16.7% | 16.7% | 0e |
| Asian | 72 (2.5%) | 39 (3.9%) | 0.0787 | 3.3% | 3.3% | 0e |
| Other | 49 (1.7%) | 11 (1.1%) | 0.0524 | 1.0% | 1.0% | 0e |
|  |  |  |  |  |  |  |
| **Ethnicity,** n (%) |  |  |  |  |  |  |
| Non-Hispanic | 2596 (93.1%) | 912 (92.4%) | 0.0262 | 93.6% | 93.6% | 0e |
| Hispanic | 193 (6.9%) | 75 (7.6%) | 0.0262 | 6.4% | 6.4% | 0e |
|  |  |  |  |  |  |  |
| **Charlson-Deyo Score**, n (%) |  |  |  |  |  |  |
| 0 | 2293 (80.1%) | 825 (82.4%) | 0.0596 | 81.0% | 81.0% | 0e |
| 1 | 391 (13.7%) | 114 (11.4%) | 0.0686 | 12.3% | 12.3% | 0e |
| 2 | 107 (3.7%) | 45 (4.5%) | 0.0382 | 4.6% | 4.6% | 0e |
| 3+ | 72 (2.5%) | 17 (1.7%) | 0.0569 | 2.1% | 2.1% | 0e |
|  |  |  |  |  |  |  |
| **Insurance**, n (%) |  |  |  |  |  |  |
| Not Insured | 207 (7.4%) | 54 (5.4%) | 0.0783 | 5.9% | 5.9% | 0e |
| Private Insurance | 1132 (40.2%) | 421 (42.4%) | 0.0444 | 40.3% | 40.3% | 0e |
| Medicaid | 453 (16.1%) | 181 (18.2%) | 0.0567 | 16.5% | 16.5% | 0e |
| Medicare | 1003 (35.6%) | 331 (33.3%) | 0.0483 | 36.6% | 36.6% | 0e |
| Other Government | 20 (0.7%) | 6 (0.6%) | 0.0131 | 0.6% | 0.6% | 0e |
|  |  |  |  |  |  |  |
| **Median Income Quartiles**, n (%) |  |  |  |  |  |  |
| <$46,227 | 521 (18.2%) | 145 (14.5%) | 0.1005 | 16.6% | 13.4% | 0.0906 |
| $46,227-$57,856 | 589 (20.6%) | 180 (18.0%) | 0.0657 | 19.5% | 18.8% | 0.0191 |
| $57,587-$74,062 | 593 (20.7%) | 221 (22.1%) | 0.0333 | 21.5% | 22.4% | 0.0227 |
| $74,063 or higher | 756 (26.4%) | 307 (30.7%) | 0.0945 | 27.9% | 31.2% | 0.0724 |
| Unknown | 404 (14.1%) | 148 (14.8%) | 0.0192 | 14.4% | 14.1% | 0.0074 |
|  |  |  |  |  |  |  |
| **Education**, n (%) |  |  |  |  |  |  |
| 15.3% or higher | 594 (20.7%) | 205 (20.5%) | 0.0066 | 19.8% | 19.0% | 0.0208 |
| 9.1%-15.2% | 771 (26.9%) | 247 (24.7%) | 0.0515 | 25.7% | 25.1% | 0.0152 |
| 5.0%-9.0% | 692 (24.2%) | 219 (21.9%) | 0.0545 | 24.7% | 23.4% | 0.0314 |
| <5.0% | 411 (14.4%) | 187 (18.7%) | 0.1167 | 15.5% | 18.9% | 0.0887 |
| Unknown | 395 (13.8%) | 143 (14.3%) | 0.0141 | 14.2% | 13.7% | 0.0150 |
|  |  |  |  |  |  |  |
| **Community**, n (%) |  |  |  |  |  |  |
| Rural | 43 (1.6%) | 19 (2.0%) | 0.0318 | 1.8% | 1.8% | 0e |
| Urban | 395 (14.2%) | 105 (10.9%) | 0.1016 | 12.2% | 12.2% | 0e |
| Metro | 2335 (84.2%) | 841 (87.2%) | 0.0842 | 86.0% | 86.0% | 0e |
|  |  |  |  |  |  |  |
| **Nodal**, n (%) |  |  |  |  |  |  |
| 0 | 599 (20.9%) | 212 (21.2%) | 0.0063 | 20.7% | 21.4% | 0.0155 |
| 1 | 1057 (36.9%) | 391 (39.1%) | 0.0441 | 36.9% | 38.5% | 0.0325 |
| 2 | 301 (10.5%) | 106 (10.6%) | 0.0025 | 10.8% | 10.5% | 0.0098 |
| 3 | 421 (14.7%) | 157 (15.7%) | 0.0273 | 15.0% | 15.8% | 0.0238 |
| Unknown | 485 (16.9%) | 135 (13.5%) | 0.0963 | 16.6% | 13.8% | 0.0770 |
|  |  |  |  |  |  |  |
| **Grade**, n (%) |  |  |  |  |  |  |
| 1 | 120 (4.2%) | 31 (3.1%) | 0.0584 | 4.2% | 3.3% | 0.0498 |
| 2 | 577 (20.2%) | 204 (20.4%) | 0.0056 | 20.8% | 20.6% | 0.0047 |
| 3 | 1023 (35.7%) | 358 (35.8%) | 0.0007 | 35.2% | 35.0% | 0.0032 |
| Unknown | 1143 (39.9%) | 408 (40.8%) | 0.0170 | 39.8% | 41.4% | 0.0264 |
|  |  |  |  |  |  |  |
| **Subtype**, n (%) |  |  |  |  |  |  |
| ER+/PR+/HER2- | 724 (25.3%) | 288 (28.8%) | 0.0785 | 28.7% | 28.7% | 0e |
| ER+/PR (+ or -)/HER2+ | 424 (14.8%) | 147 (14.7%) | 0.0035 | 13.6% | 13.6% | 0e |
| ER-/PR-/HER2+ | 365 (12.7%) | 127 (12.7%) | 0.0018 | 12.8% | 12.8% | 0e |
| ER-/PR-/HER2- | 693 (24.2%) | 200 (20.0%) | 0.1020 | 20.7% | 20.7% | 0e |
| Unknown | 657 (22.9%) | 239 (23.9%) | 0.0219 | 24.3% | 24.3% | 0e |
|  |  |  |  |  |  |  |
| **Treatment facility type**, n (%) |  |  |  |  |  |  |
| Community Cancer Program | 196 (7.3%) | 43 (4.6%) | 0.1114 | 5.2% | 5.2% | 0e |
| Comprehensive Community Cancer Program | 1054 (39.2%) | 323 (34.9%) | 0.0881 | 35.7% | 35.7% | 0e |
| Academic/Research Program | 885 (32.9%) | 374 (40.4%) | 0.1571 | 38.7% | 38.7% | 0e |
| Integrated Network Cancer Program | 556 (20.7%) | 185 (20.0%) | 0.0164 | 20.5% | 20.5% | 0e |
|  |  |  |  |  |  |  |
| **Chemotherapy**, n (%) |  |  |  |  |  |  |
| Yes | 1787 (63.5%) | 698 (70.7%) | 0.1545 | 67.4% | 67.4% | 0e |
| No | 1028 (36.5%) | 289 (29.3%) | 0.1545 | 32.6% | 32.6% | 0e |
|  |  |  |  |  |  |  |
| **Hormone therapy**, n (%) |  |  |  |  |  |  |
| Yes | 1082 (38.4%) | 425 (43.2%) | 0.0977 | 42.6% | 42.6% | 0e |
| No | 1733 (61.6%) | 558 (56.8%) | 0.0977 | 57.4% | 57.4% | 0e |
|  |  |  |  |  |  |  |
| **Immunotherapy**, n (%) |  |  |  |  |  |  |
| Yes | 595 (20.9%) | 267 (26.8%) | 0.1377 | 25.1% | 25.1% | 0e |
| No | 2252 (79.1%) | 731 (73.2%) | 0.1377 | 74.9% | 74.9% | 0e |

a Absolute difference in means or proportions divided by pooled standard deviation. Imbalance between WBRT and SRS groups was defined as an absolute value greater than 0.10; smaller values indicated better balance.

b Using overlap weighting to build analytical cohort in which group or treatment type (WBRT or SRS) is independent of baseline characteristics influencing the initiation of certain treatment

c Overlap-weighted proportions.

d Overlap-weighted standardized differences. Age, race, ethnicity, charlson-deyo score, insurance, community, subtype, facility type, chemotherapy, hormone therapy and immunotherapy were used to estimate the weights.

e Overlapping weights resulted in exact balance for this variable.

*Abbreviations*: WBRT=Whole brain radiation therapy; SRS=Stereotactic radiosurgery
